# Supplementary material for: System Prediction and Validation of TCM for Chronic Myeloid Leukemia Treatment from the Perspective of Low‐Toxicity Chemotherapy: A Stilbene α‐Viniferin Has a Proapoptotic Effect on K562 Cells via the Mitochondrial Pathway
Source: Hindawi journal article supplement (doi:10.1155/2020/1986962), 2020-01-01
Supplement: f1 [file 1986962.f1.zip]

Supplemental Table-5. NCI Cancer Scree date of 32 candidate compounds on K562

| Compound                                          | LogGI <sub>50</sub> | One dose (10μM)<br>Growth percent% |
|---------------------------------------------------|---------------------|------------------------------------|
| Majudin                                           | -4                  |                                    |
| Ammidin                                           |                     | -                                  |
| Cnidilin                                          |                     | -                                  |
| notoptol                                          |                     | -                                  |
| Bergaptin                                         |                     | -                                  |
| 8-geranoxo-5-methoxypsoralen                      |                     | -                                  |
| naringenin                                        |                     | 97.6                               |
| Isoflavon                                         | -4                  |                                    |
| 4,7-Dihydroxy-5-methoxyl-6-methyl-8-formyl-flavan |                     | 106.2                              |
| Chryseriol                                        |                     | -                                  |
| kaempferol                                        | -4                  |                                    |
| Diosmetin                                         | -4                  |                                    |
| Genkwanin                                         |                     | -                                  |
| Kaempferid                                        |                     | -                                  |
| morin                                             | -4                  |                                    |
| Syringetin                                        |                     | -                                  |
| 6,8-Dihydroxy-7-methoxyxanthone                   |                     | 115.8                              |
| isorhamnetin                                      |                     | -                                  |
| suchilactone                                      |                     | -                                  |
| Dihydroresveratrol                                | -4.1                |                                    |
| α-Viniferin                                       | -5.2                |                                    |
| cis-resveratrol                                   |                     | -                                  |
| cis-pinosylvin                                    |                     | 89                                 |
| 4'-methylpinosylvin                               |                     | -                                  |
| Dehydrodieugenol                                  |                     | -                                  |
| (+)-medioresinol (40957-99-1)                     |                     | -                                  |
| Moracin M                                         |                     | -                                  |
| AIDS214634                                        |                     | -                                  |
| Oxysanguinarine                                   |                     | -                                  |
| Torachryson                                       |                     | -                                  |
