# Supplementary material for: System Prediction and Validation of TCM for Chronic Myeloid Leukemia Treatment from the Perspective of Low‐Toxicity Chemotherapy: A Stilbene α‐Viniferin Has a Proapoptotic Effect on K562 Cells via the Mitochondrial Pathway
Source: Hindawi journal article supplement (doi:10.1155/2020/1986962), 2020-01-01
Supplement: f1 [file 1986962.f1.zip]

## Method

### 1. Evaluation of Caspase-9 gene expression

Detection of Caspase-9 gene expression using quantitative RT-PCR, which was performed using PCR Master Mix (Sangong Co.), cDNA template, and each primer. The RT-PCR products were semi-quantitatively assessed by 0.5% agarose gel electrophoresis using a GelDOC analysis system (Bio-Rad).

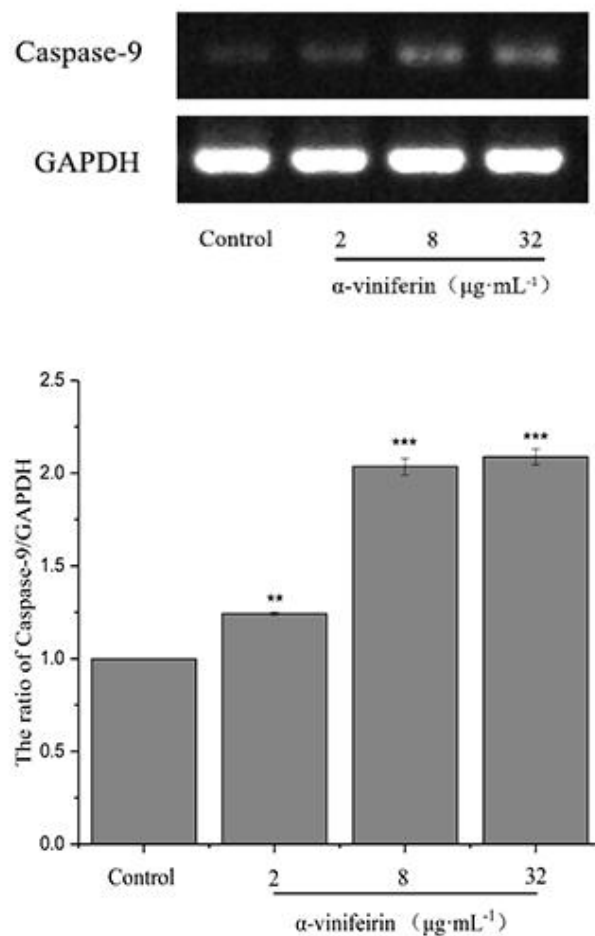

**Supplemental Figure 3:** Evaluation of  $\alpha$ -viniferin on the mRNA expression of Caspase-9. K562 cells were cultured with 0~32  $\mu\text{g}\cdot\text{mL}^{-1}$   $\alpha$ -viniferin for 24 h. Evaluation of mRNA expression of Caspase-9 by RT-PCR and performing relative quantitative analysis of mRNA expression (\*\*\*)  $P < 0.001$ , (\*\*)  $P < 0.01$ , (\*)  $P < 0.05$  vs control.
