# Supplementary material for: System Prediction and Validation of TCM for Chronic Myeloid Leukemia Treatment from the Perspective of Low‐Toxicity Chemotherapy: A Stilbene α‐Viniferin Has a Proapoptotic Effect on K562 Cells via the Mitochondrial Pathway
Source: Hindawi journal article supplement (doi:10.1155/2020/1986962), 2020-01-01
Supplement: f1 [file 1986962.f1.zip]

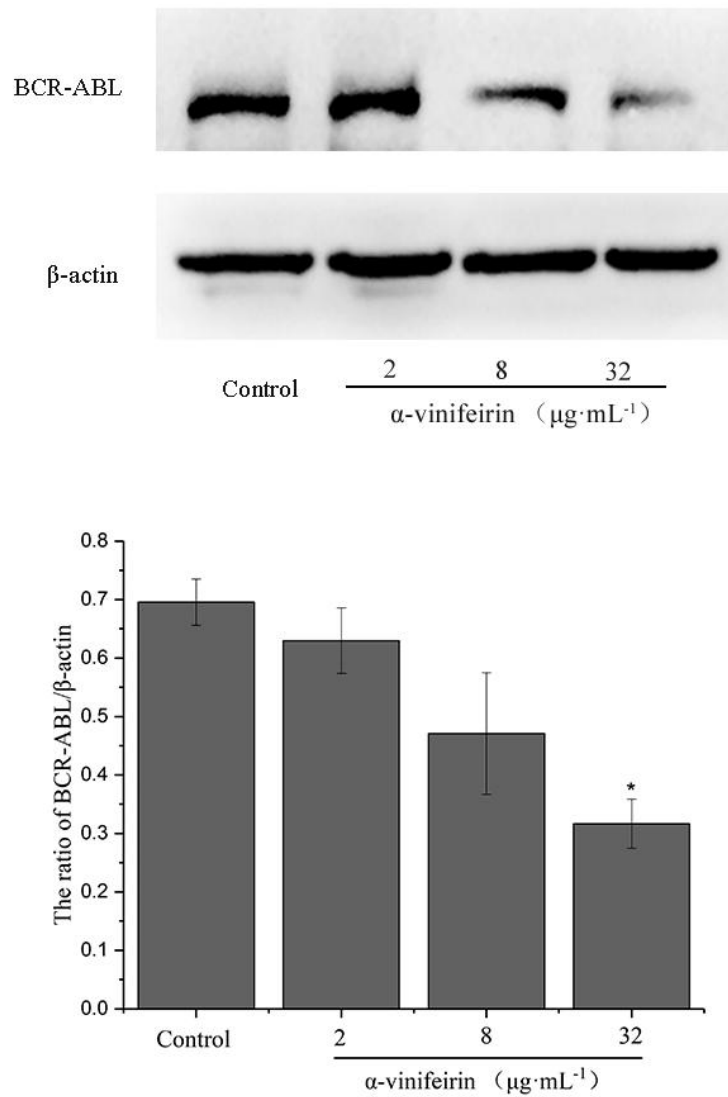

**Supplemental Figure 2:** Evaluation of  $\alpha$ -viniferin on the protein expression of BCR/ABL. K562 cells were cultured with 0~32  $\mu\text{g}\cdot\text{mL}^{-1}$   $\alpha$ -viniferin for 24 h. Evaluation of protein expression of BCR/ABL by Western blotting and performing relative quantitative analysis of protein expression (\*\*\*)  $P<0.001$ , (\*\*)  $P<0.01$ , (\*)  $P<0.05$  vs control.
