# Supplementary material for: System Prediction and Validation of TCM for Chronic Myeloid Leukemia Treatment from the Perspective of Low‐Toxicity Chemotherapy: A Stilbene α‐Viniferin Has a Proapoptotic Effect on K562 Cells via the Mitochondrial Pathway
Source: Hindawi journal article supplement (doi:10.1155/2020/1986962), 2020-01-01
Supplement: f1 [file 1986962.f1.zip]

Supplemental Table-1. TCM prescriptions for CML

| source                          | Formula name | Formula composition                                                                                                                                                                                                                                                                                                                                                                |
|---------------------------------|--------------|------------------------------------------------------------------------------------------------------------------------------------------------------------------------------------------------------------------------------------------------------------------------------------------------------------------------------------------------------------------------------------|
| Heat clearing and blood cooling | 戎盐丸          | <i>Scutellaria baicalensis</i> Georgi. Dried Root、 <i>Phellodendron amurense</i> Rupr. Dried Root、 <i>Rheum palmatum</i> L. Dried,Root C.A.Mey. Dried Root、 <i>Glycyrrhiza uralensis</i> Fisch. Dried Root.                                                                                                                                                                        |
|                                 |              | <i>Glycyrrhiza uralensis</i> Fisch. Dried Root、 <i>Nairii</i> Sulfas、 <i>Citrus aurantium</i> L. Dry yung fruit、 <i>Magnolia officinalis</i> Rehder & E.H.Wilson, Dry branches, root bark、 <i>Panax ginseng</i> C.A.Mey. Dried Root、 <i>Angelica sinensis</i> (Oliv.) Diels. Dried Root、 <i>Glycyrrhiza uralensis</i> Fisch. Dried Root.                                           |
|                                 |              | <i>Lycopus lucidus</i> var. <i>hirtus</i> Regel、 <i>Rhinoceros unicornis</i> L, Dried Root (Brewed with wine)、 <i>Taraxacum mongolicum</i> Hand.-Mazz. Dried Root、 <i>Smilax glabra</i> Roxb. Dried Root、 <i>Lycopus lucidus</i> Turcz. ex Benth. Dried Root、 <i>Isatis indigotica</i> Fortune ex Lindl. Dried Root、 <i>Artemisia scoparia</i> Waldst. & Kitam. Dried aboveground. |
|                                 | 虎杖煎剂         | <i>Lycopus lucidus</i> Turcz. ex Benth. Dried Root、 <i>Isatis indigotica</i> Fortune ex Lindl. Dried Root、 <i>Taraxacum mongolicum</i> Hand.-Mazz. Dried Root、 <i>Artemisia scoparia</i> Waldst. & Kitam. Dried aboveground、 <i>Citrus reticulata</i> Blanco, Dried fruit peel.                                                                                                    |
|                                 |              | <i>Lycopus lucidus</i> Turcz. ex Benth. Dried Root、 <i>Isatis indigotica</i> Fortune ex Lindl. Dried Root、 <i>Paeonia lactiflora</i> Pall, Dry root、 <i>Cryptotympanapustulata</i> Fabricius、 <i>Moutan officinalis</i> (L.) Lindl. & Paxton, cortex.                                                                                                                              |
|                                 |              |                                                                                                                                                                                                                                                                                                                                                                                    |

|          |       |                                                                                                                                                                                                                                                                                                                                                                                                                                                                                                                                                                       |
|----------|-------|-----------------------------------------------------------------------------------------------------------------------------------------------------------------------------------------------------------------------------------------------------------------------------------------------------------------------------------------------------------------------------------------------------------------------------------------------------------------------------------------------------------------------------------------------------------------------|
|          |       | <i>Asparagus cochinchinensis</i> (Lour.) Merr., <i>Ophiopogon japonicus</i> (L.f) Ker-Gawl., <i>Rehmannia glutinosa</i> (Gaertn.) DC. Dry root,                                                                                                                                                                                                                                                                                                                                                                                                                       |
| 《万病回春》卷四 | 清火滋阴汤 | <i>Moutan officinalis</i> (L.) Lindl. & Paxton, cortex, <i>Paeonia lactiflora</i> Pall., Dry root, <i>Gardenia jasminoides</i> J.Ellis, Dried nutlet, <i>Dioscorea opposita</i> Thunb., <i>Cornus officinalis</i> Sieb.et Zucc.Dry yung fruit                                                                                                                                                                                                                                                                                                                         |
|          |       | <i>Bupleurum chinense</i> DC. Dried Root, <i>Paeonia lactiflora</i> Pall., Dry root, <i>Moutan officinalis</i> (L.) Lindl. & Paxton, cortex, <i>Citrus reticulata</i> Blanco,Dried young fruit peel, <i>Forsythia suspensa</i> (Thunb.) Vahl,                                                                                                                                                                                                                                                                                                                         |
| 《医学入门》卷八 | 柴胡抑肝汤 | Dried fruit, <i>Lycium chinense</i> Mil, Dried root bark, <i>Cyperus rotundus</i> L., Dry rhizome, <i>Atractylodes lancea</i> (Thunb.) DC, Dry rhizome, <i>Gardenia jasminoides</i> J.Ellis, Dried fruit, <i>Ligusticum acuminatum</i> Franch. Dry rhizome, <i>Glycyrrhiza uralensis</i> Fisch. Dried Root                                                                                                                                                                                                                                                            |
|          |       | <i>Rehmannia glutinosa</i> (Gaertn.) DC. Dry root, <i>Paeonia lactiflora</i> Pall. Dried root, <i>Dioscorea opposita</i> Thunb., <i>Sophorajaponica</i> L. Dry flower bud, <i>Coptis chinensis</i> Franch, Dry rhizome, <i>Schizonepeta tenuifolia</i> (Benth.) Briq. Dried aboveground, <i>Rubia cordifolia</i> L. Dry rhizome and root, <i>Sanguisorba officinalis</i> L. Dried root, <i>Prunus alabamensis</i> C.Mohr, Dried pulp, <i>Cimicifuga heracleifolia</i> Kom. Dried rhizome, <i>Platycladus orientalis</i> (L.) Franco, Dry branches slightly and leaves |
| 《活人方》卷二  | 结阴丸   | <i>Ligusticum acuminatum</i> Franch. Dry rhizome, <i>Angelica sinensis</i> (Oliv.) Diels. Dried Root, <i>Paeonia lactiflora</i> Pall. Dried root, <i>Cyperus rotundus</i> L., Dry rhizome, <i>Ophiopogon japonicus</i> (L.f) Ker-Gawl., <i>Moutan officinalis</i> (L.) Lindl. & Paxton, cortex, <i>Cyathula achyranthoides</i> (Kunth) Moq. Dry rhizome, <i>Lycium chinense</i> Mil,                                                                                                                                                                                  |
| 钟磊方      | 清金养血汤 |                                                                                                                                                                                                                                                                                                                                                                                                                                                                                                                                                                       |

|            |       |                                                                                                                                                                                                                                                                                                                                                                                                                                                                                                                                                                                                                                                                                                                                                                               |
|------------|-------|-------------------------------------------------------------------------------------------------------------------------------------------------------------------------------------------------------------------------------------------------------------------------------------------------------------------------------------------------------------------------------------------------------------------------------------------------------------------------------------------------------------------------------------------------------------------------------------------------------------------------------------------------------------------------------------------------------------------------------------------------------------------------------|
|            |       | Dried root bark、 <i>Rehmannia glutinosa</i> (Gaertn.) DC. Dry root、<br><i>Schisandra arisanensis</i> Hayata, Dry ripe fruit、 <i>Glycyrrhiza uralensis</i><br>Fisch. Dried Root, Honeyed                                                                                                                                                                                                                                                                                                                                                                                                                                                                                                                                                                                       |
|            |       | <i>Angelica sinensis</i> (Oliv.) Diels. Dried Root、 <i>Paeonia lactiflora</i> Pall.<br>Dried root、 <i>Cyathula achyranthoides</i> (Kunth) Moq. Dry rhizome、<br><i>Bupleurum chinense</i> DC. Dried Root、 <i>Poria cocos</i> (Schw.) Wolf, Dried<br>Root、 <i>Lycopus lucidus</i> Turcz. ex Benth. Dried Root、 <i>Artemisia scoparia</i><br>Waldst. & Kitam. Dried aboveground、 <i>Hedyotis diffusa</i> var. <i>extensa</i><br>(Hook.f.) R.Dutta, Dried aboveground、 <i>Glycyrrhiza uralensis</i> Fisch.<br>Dried Root                                                                                                                                                                                                                                                          |
| 《言庚孚医疗经验集》 | 抗原汤   | <i>Paeonia lactiflora</i> Pall. Dried root、 <i>Arecacatechu</i> L. Dry mature seeds、<br><i>Notopterygium incisum</i> K.C.Ting ex H.T.Chang, Dry rhizome and<br>root、 <i>Angelica pubescens</i> Maxim. Dried root、 <i>Bupleurum chinense</i> DC.<br>Dried Root、 <i>Stellaria dichotoma</i> L. Dried Root、 <i>Platycodon</i><br><i>grandiflorum</i> (Jacq.) A.DC. Dried Root、 <i>Magnolia officinalis</i> Rehder<br>& E.H.Wilson, Dry branches, root bark、 <i>Citrus aurantium</i> L. Dry<br>young fruit、 <i>Poria cocos</i> (Schw.) Wolf, Dried Root、 <i>Moutan officinalis</i><br>(L.) Lindl. & Paxton, cortex、 <i>Mentha haplocalyx</i> Briq. Dry leaf、<br><i>Amomum tsao-ko</i> Crevost et Lemaire, Dried nutlet、 <i>Achyranthes</i><br><i>bidentata</i> Blume, Dried root. |
| 《万病回春》卷六   | 达原败毒散 | <i>Glycyrrhiza uralensis</i> Fisch. Dried Root、 <i>Nairii Sulfas</i> 、 <i>Eupolyphaga</i><br><i>sinensis</i> Walker、 <i>Whitmania pigra</i> Whitman、 <i>Tabanus bivittatus</i><br>Matsumura、Grub.                                                                                                                                                                                                                                                                                                                                                                                                                                                                                                                                                                             |
| 《金匱要略》     | 大黃蟄虫丸 |                                                                                                                                                                                                                                                                                                                                                                                                                                                                                                                                                                                                                                                                                                                                                                               |

|                                           |            |       |                                                                                                                                                             |
|-------------------------------------------|------------|-------|-------------------------------------------------------------------------------------------------------------------------------------------------------------|
|                                           |            |       | <i>Glycyrrhiza uralensis</i> Fisch. Dried Root、 <i>Platycodon</i> 、 <i>grandiflorum</i>                                                                     |
|                                           | 《肘后方》      | 屠苏酒   | (Jacq.) A.DC. Dried Root、 <i>Cyathula achyranthoides</i> (Kunth) Moq.                                                                                       |
|                                           | 卷八         |       | Dry rhizome、 <i>Aconitum abietetorum</i> W.T.Wang & L.Q.Li, Dried root、 <i>Smilax china</i> L. Dry rhizome.                                                 |
|                                           |            |       | <i>Cimicifuga heracleifolia</i> Kom. Dried rhizome、 <i>Scrophularia</i>                                                                                     |
|                                           |            |       | <i>aequilabris</i> Tsoong, Dried root、 <i>Glycyrrhiza uralensis</i> Fisch. Dried                                                                            |
|                                           | 《外台》卷十一引《近 | 调中方   | Root、 <i>Dioscorea opposita</i> Thunb.、 <i>Poria cocos</i> (Schw.) Wolf, Dried                                                                              |
|                                           | 效方》        |       | Root、 <i>Ostrea gigas</i> Thunberg、 <i>Rhaponticum uniflorum</i> (L.) DC. Dried                                                                             |
|                                           |            |       | root、 <i>Citrus aurantium</i> L. Dried yung fruit、 <i>Smilax china</i> L. Dry                                                                               |
|                                           |            |       | rhizome、 <i>Coptis chinensis</i> Franch.,Dried Root.                                                                                                        |
|                                           |            |       | <i>Glycyrrhiza uralensis</i> Fisch. Dried Root、 <i>Cyathula achyranthoides</i>                                                                              |
|                                           |            |       | (Kunth) Moq. Dry rhizome、 <i>Platycodon</i> 、 <i>grandiflorum</i> (Jacq.) A.DC.                                                                             |
|                                           | 《华佗神医秘传》卷四 | 辟疫酒   | Dried Root、 <i>Aconitum abietetorum</i> W.T.Wang & L.Q.Li, Dried root、 <i>Smilax china</i> L. Dry rhizome                                                   |
| Relieving<br>poisoning<br>and detoxifying |            |       | <i>Smilax glabra</i> Roxb. Dried Root、 <i>Lonicera acuminata</i> Wall. Dry stem、 <i>Clematis chinensis</i> Osbeck, Dry rhizome and root、 <i>Glycyrrhiza</i> |
|                                           | 《朱仁康临床经验集》 | 白疔二号方 | <i>uralensis</i> Fisch. Dried Root、 <i>Isatis indigotica</i> Fortune ex Lindl. Dried                                                                        |
|                                           |            |       | Root、 <i>Sophora tonkinensis</i> Gagnep. Dry rhizome and root、 <i>Dictamnus</i>                                                                             |
|                                           |            |       | <i>dasycarpus</i> Turcz. Dry bark                                                                                                                           |
|                                           |            |       | <i>Dictamnus dasycarpus</i> Turcz. Dry bark、 <i>Glycine arenaria</i> Tindale, Dry                                                                           |
|                                           |            |       | processed products after seed germination、 <i>Coix lacryma-jobi</i> L. Dry                                                                                  |
|                                           |            |       | mature seeds、 <i>Gardenia jasminoides</i> J.Ellis, Dried nutlet、 <i>Moutan</i>                                                                              |
|                                           | 《赵炳南临床经验集》 | 除湿解毒汤 | <i>officinalis</i> (L.) Lindl. & Paxton, cortex、 <i>Lonicera japonica</i> Thunb. Dry                                                                        |
|                                           |            |       | flower buds or open flowers、 <i>Corydalis bungeana</i> Turcz. Dry whole                                                                                     |
|                                           |            |       | grass、 <i>Forsythia suspensa</i> (Thunb.) Vahl, Dried fruit、 <i>Akebia quinata</i>                                                                          |
|                                           |            |       | (Thunb.) Decne, Dry cane、 <i>Glycyrrhiza uralensis</i> Fisch. Dried Root.                                                                                   |

|                  |         |                                                                                                                                                                                                                                                                                                                                                                                                                                                                                                                                                                                                           |
|------------------|---------|-----------------------------------------------------------------------------------------------------------------------------------------------------------------------------------------------------------------------------------------------------------------------------------------------------------------------------------------------------------------------------------------------------------------------------------------------------------------------------------------------------------------------------------------------------------------------------------------------------------|
| 《全国中药成药处方集》（沈阳方） | 花柳解毒丸   | <p><i>Lonicera japonica</i> Thunb. Dry flower buds or open flowers、<i>Dictamnus dasycarpus</i> Turcz. Dry bark、<i>Coix lacryma-jobi</i> L. Dry mature seeds、<i>Akebia quinata</i> (Thunb.)Decne, Dry cane、<i>Smilax glabra</i> Roxb. Dried Root、<i>Saposhnikovia divaricata</i> (Turcz.) Schischk, Dried Root、<i>Chaenomeles speciosa</i> (Sweet) Nakai, Dry close to ripe fruit、<i>Gleditsia sinensis</i> Lam. Dry young fruit、<i>Angelica acutiloba</i> (Siebold &amp; Zucc.) Kitag. Dry tail of the root、<i>Carthamus tinctorius</i> L. Dry flower、<i>Glycyrrhiza uralensis</i> Fisch. Dried Root.</p> |
| 僧焰如方             | 活络通脉清解汤 | <p><i>Panax ginseng</i> C.A.Mey. Dried Root、<i>Angelica sinensis</i> (Oliv.) Diels. Dried Root、<i>Lonicera macranthoides</i> Hand.-Mazz. Dry stem、<i>Salvia miltiorrhiza</i> Bunge, Dry rhizome and root、<i>Ligusticum acuminatum</i> Franch. Dry rhizome、<i>Clematis chinensis</i> Osbeck, Dry rhizome and root、<i>Gleditsia sinensis</i> Lam. Dry spines、<i>Taraxacum mongolicum</i> Hand.-Mazz. Dried Root、<i>Smilax glabra</i> Roxb. Dried Root、<i>Glycyrrhiza uralensis</i> Fisch. Dried Root.</p>                                                                                                   |
| 《实用中医外科学》        | 土茯苓合剂   | <p><i>Smilax glabra</i> Roxb. Dried Root、<i>Lonicera japonica</i> Thunb. Dry flower buds or open flowers、<i>Clematis chinensis</i> Osbeck, Dry rhizome and root、<i>Dictamnus dasycarpus</i> Turcz. Dry bark、<i>Glycyrrhiza uralensis</i> Fisch. Dried Root、<i>Xanthium sibiricum</i> Patr. Dry fruit.</p>                                                                                                                                                                                                                                                                                                 |
| 来春茂方             | 乙肝解毒汤   | <p><i>Astragalus aaronii</i> (Eig) Zohary, Dried Root、<i>Lycopus lucidus</i> Turcz. ex Benth. Dried Root、<i>Hedyotis diffusa</i> var. <i>extensa</i> (Hook.f.) R.Dutta, Dried aboveground、<i>Scutellaria adenostegia</i> Briq. Dry whole grass、<i>Agrimonia pilosa</i> Ledeb. Dry aerial part、<i>Pyrola calliantha</i> Andres, Dry whole grass、<i>Smilax glabra</i> Roxb. Dried Root、<i>Bupleurum chinense</i> DC. Dried Root、<i>Curcuma longa</i> L, Dry root、<i>Angelica sinensis</i> (Oliv.) Diels. Dried Root、<i>Cinnamomum cassia</i> (L.) J.Presl,</p>                                              |

|                                           |       |  |                                                                                      |
|-------------------------------------------|-------|--|--------------------------------------------------------------------------------------|
|                                           |       |  | Dry twig、 <i>Glycyrrhiza uralensis</i> Fisch. Dried Root.                            |
|                                           |       |  |                                                                                      |
|                                           |       |  | <i>Rehmannia glutinosa</i> (Gaertn.) DC. Dry root、 <i>Angelica pubescens</i>         |
|                                           |       |  | Maxim. Dried root、 <i>Phellodendron amurense</i> Rupr. Dried Root、                   |
|                                           |       |  | <i>Saposhnikovia divaricata</i> (Turcz.) Schischk, Dried Root、                       |
|                                           |       |  | <i>Anemarrhena asphodeloides</i> Bge.、 <i>Viburnum acerifolium</i> L. Dry            |
|                                           |       |  | mature fruit、 <i>Peucedanum praeruptorum</i> Dunn, Dry root、 <i>Angelica</i>         |
| 《原机启微》卷下                                  | 抑阳酒连散 |  | <i>acutiloba</i> (Siebold & Zucc.) Kitag. Dry root、 <i>Notopterygium incisum</i>     |
|                                           |       |  | K.C.Ting ex H.T.Chang, Dry rhizome and root、 <i>Glycyrrhiza uralensis</i>            |
|                                           |       |  | Fisch. Dried Root、 <i>Scutellaria baicalensis</i> Georgi. Dried Root、                |
|                                           |       |  | <i>Gardenia jasminoides</i> J.Ellis, Dried nutlet、 <i>Coptis chinensis</i>           |
|                                           |       |  | Franch.,Dried Root、 <i>Stephania tetrandra</i> S.Moore, Dried Root、                  |
|                                           |       |  |                                                                                      |
| Eliminating wind<br>and<br>dispersing wet |       |  | <i>Ziziphusjuzuba</i> Mill.var.spinosa (Bunge) HuexH.F.Chou, Dried nutlet、           |
|                                           |       |  | <i>Saiga tatarica</i> Linnaeus、 <i>Dendrobium nobile</i> Lind, Dry stem、             |
|                                           |       |  | <i>Astragalus aaronii</i> (Eig) Zohary, Dried Root、 <i>Notopterygium incisum</i>     |
| 《柳森可用方》                                   | 十七味药酒 |  | K.C.Ting ex H.T.Chang, Dry rhizome and root、 <i>Rehmannia glutinosa</i>              |
|                                           |       |  | (Gaertn.) DC. Dry root、 <i>Achyranthes bidentata</i> Blume, Dried root、              |
|                                           |       |  | <i>Cinnamomum cassia</i> (L.) J.Presl, Dry bark、 <i>Poria cocos</i> (Schw.) Wolf,    |
|                                           |       |  | Dried Root、 <i>Eucommia ulmoides</i> Oliv. Dry bark.                                 |
|                                           |       |  |                                                                                      |
|                                           |       |  | <i>Bupleurum chinense</i> DC. Dried Root、 <i>Pueraria alopecuroides</i> Craib,       |
|                                           |       |  | Dry root、 <i>Salvia miltiorrhiza</i> Bunge, Dry rhizome and root、                    |
|                                           |       |  | <i>Chrysanthemum morifolium</i> Ramat.Dry headed inflorescence、 <i>Morus</i>         |
| 李润民方                                      | 化痰清散汤 |  | <i>alba</i> L. Dry twig、 <i>Moutan officinalis</i> (L.) Lindl. & Paxton, cortex、     |
|                                           |       |  | <i>Paeonia lactiflora</i> PalL, Dry root、 <i>Carthamus tinctorius</i> L. Dry flower、 |
|                                           |       |  | <i>Pheretima aspergillum</i> E.Perrier、 <i>Mentha haplocalyx</i> Briq. Dry leaf.     |

|            |         |                                                                                            |
|------------|---------|--------------------------------------------------------------------------------------------|
| 张海水方       | 疏风养血汤加減 | <i>Gastro diaelata</i> Bl. Dry roots、 <i>Hyriopsis cumingii</i> Lea, shell、 <i>Paeonia</i> |
|            |         | <i>lactiflora</i> Pall, Dry root、 <i>Glycyrrhiza uralensis</i> Fisch. Dried Root、          |
|            |         | <i>Pueraria alopecuroides</i> Craib, Dry root、 <i>Salvia miltiorrhiza</i> Bunge,           |
| 《马培之医案》    | 通络利温汤   | Dry rhizome and root、 <i>Unacaria rhynchophylla</i> (Miq.) Miq.ex Havil,                   |
|            |         | Dry hooked stem、 <i>Lonicera macranthoides</i> Hand.-Mazz. Dry stem、                       |
|            |         | <i>Morus alba</i> L. Dry twig、 <i>Gentiana macrophylla</i> Pall. Dry root、                 |
| 《景岳全书》卷五十四 | 愈风燥湿化痰丸 | <i>BombyxmoriLinnaeus</i> , Dry body caused by <i>Beauveria bassiana</i> 、                 |
|            |         | <i>Curcuma aeruginosa</i> Roxb. Dry rhizome.                                               |
|            |         | <i>Glycine arenaria</i> Tindale, Dry processed products after seed                         |
|            |         | germination、 <i>Stephania tetrandra</i> S.Moore. Dry root、 <i>Paeonia</i>                  |
|            |         | <i>lactiflora</i> Pall, Dry root、 <i>Gentiana macrophylla</i> Pall. Dry root、              |
|            |         | <i>Cyathula achyranthoides</i> (Kunth) Moq. Dry root、 <i>Pheretima</i>                     |
|            |         | <i>aspergillum</i> E.Perrier、 <i>Angelica acutiloba</i> (Siebold & Zucc.) Kitag. Dry       |
|            |         | tail of the root、 <i>Morus alba</i> L. Dry twig、 <i>Phellodendron amurense</i>             |
|            |         | Rupr. Dried Root.                                                                          |
|            |         | <i>Cyathula achyranthoides</i> (Kunth) Moq. Dry rhizome,fried、                             |
|            |         | <i>Atractylodes lancea</i> (Thunb.) DC, Dry rhizome,Soaking rice water、                    |
|            |         | <i>Eucommia ulmoides</i> Oliv, Fried ginger、 <i>Achyranthes bidentata</i> Blume,           |
|            |         | Dried root、 <i>Ligusticum acuminatum</i> Franch. Dry rhizome、 <i>Coix</i>                  |
|            |         | <i>lacryma-jobi</i> L. Dry mature seeds、 <i>Psoralea corylifolia</i> L. Dry mature         |
|            |         | fruit、 <i>Angelica sinensis</i> (Oliv.) Diels. Dried Root、 <i>Gleditsia sinensis</i>       |
|            |         | Lam. Dry sterile fruit、 <i>Saposhnikovia divaricata</i> (Turcz.) Schischk,                 |
|            |         | Dried Root、 <i>Notopterygium incisum</i> K.C.Ting ex H.T.Chang, Dry                        |
|            |         | rhizome and root、 <i>Angelica pubescens</i> Maxim. Dried root、                             |
|            |         | <i>Rehmannia glutinosa</i> (Gaertn.) DC. Dry root、 <i>Stephania tetrandra</i>              |
|            |         | S.Moore. Dry root、 <i>Pinellia tripartita</i> (Blume) Schott, Dry blocky                   |
|            |         | stem、 <i>Arisaema agasthyanum</i> Sivad. & Sath.Kumar, Dry blocky stem、                    |
|            |         | <i>Gastrodia elata</i> Bl. Dry blocky stem、 <i>Aquilaria sinensis</i> (Lour.)              |

|              |      |                                                                                                                                                                                                                                                                                                                                        |
|--------------|------|----------------------------------------------------------------------------------------------------------------------------------------------------------------------------------------------------------------------------------------------------------------------------------------------------------------------------------------|
|              |      | <p>Gilg, Resin-containing wood、<i>Aucklandia lappa</i> DC. Dry root、<i>Citrus reticulata</i> Blanco, Dried fruit peel、<i>Aconitum abietetorum</i> W.T.Wang &amp; L.Q.Li, Dried root、<i>BombyxmoriLinnaeus</i>, Dry body caused by <i>Beauveria bassiana</i>、<i>Buthus martensii</i> Karsch, Dry body.</p>                              |
|              |      | <p><i>Saposhnikovia divaricata</i> (Turcz.) Schischk, Dried Root、<i>Cyathula achyranthoides</i> (Kunth) Moq. Dry rhizome、<i>Eucommia ulmoides</i> Oliv. Dry bark、<i>Angelica sinensis</i> (Oliv.) Diels. Dried Root、<i>Rehmannia glutinosa</i> (Gaertn.) DC. Dry root、<i>Steamed</i>、<i>Paeonia lactiflora</i> Pall.</p>               |
| 《百一》卷三       | 大防风汤 | <p>Dried root、<i>Astragalus aaronii</i> (Eig) Zohary, Dried Root、<i>Notopterygium incisum</i> K.C.Ting ex H.T.Chang, Dry rhizome and root、<i>Achyranthes bidentata</i> Blume, Dried root、<i>Glycyrrhiza uralensis</i> Fisch. Dried Root、<i>Panax ginseng</i> C.A.Mey. Dried Root、<i>Ligusticum acuminatum</i> Franch. Dry rhizome.</p> |
|              |      | <p><i>Saposhnikovia divaricata</i> (Turcz.) Schischk, Dried Root、<i>Cyathula achyranthoides</i> (Kunth) Moq. Dry rhizome、<i>Eucommia ulmoides</i> Oliv. Dry bark、<i>Angelica sinensis</i> (Oliv.) Diels. Dried Root、<i>Rehmannia glutinosa</i> (Gaertn.) DC. Dry root、<i>Steamed</i>、<i>Paeonia lactiflora</i> Pall.</p>               |
| 《宋•太平惠民和剂局方》 | 大防风汤 | <p>Dried root、<i>Astragalus aaronii</i> (Eig) Zohary, Dried Root、<i>Notopterygium incisum</i> K.C.Ting ex H.T.Chang, Dry rhizome and root、<i>Achyranthes bidentata</i> Blume, Dried root、<i>Glycyrrhiza uralensis</i> Fisch. Dried Root、<i>Panax ginseng</i> C.A.Mey. Dried Root、<i>Ligusticum acuminatum</i> Franch. Dry rhizome.</p> |



|           |       |                                                                                                                                                                                                                                                                                                                                                                                                                                                                                                                                                                                                                                                       |
|-----------|-------|-------------------------------------------------------------------------------------------------------------------------------------------------------------------------------------------------------------------------------------------------------------------------------------------------------------------------------------------------------------------------------------------------------------------------------------------------------------------------------------------------------------------------------------------------------------------------------------------------------------------------------------------------------|
| 陈国藩方      | 咳嗽止血汤 | <i>Rehmannia glutinosa</i> (Gaertn.) DC. Dry root、 <i>Agrimonia pilosa</i> Ledeb.                                                                                                                                                                                                                                                                                                                                                                                                                                                                                                                                                                     |
|           |       | Dry aerial part、 <i>Stemona sessilifolia</i> (Miq.) Miq. Dry root、 <i>Bletilla striata</i> (Thunb.) Rchb.f., Dry root、 <i>Lilium brownii</i> F.E.Brown                                                                                                                                                                                                                                                                                                                                                                                                                                                                                                |
|           |       | var.viridulum Baker, Dry fleshy linden、 <i>Asparagus cochinchinensis</i> (Lour.) Merr.、 <i>Glehnia littoralis</i> F.Schmidt ex Miq. Dry root、 <i>Panax notoginseng</i> (Burkill) F.H.Chen, Dry rhizome and root, powder.                                                                                                                                                                                                                                                                                                                                                                                                                              |
|           |       | <i>Rehmannia glutinosa</i> (Gaertn.) DC. Dry root、 <i>Stemona japonica</i> (Blume) Miq. Dry root、 <i>Asparagus cochinchinensis</i> (Lour.) Merr.、                                                                                                                                                                                                                                                                                                                                                                                                                                                                                                     |
| 《中医妇科治疗学》 | 冬地百部饮 | <i>Eriobotrya japonica</i> (Thunb.) Lindl. Dry leaf、 <i>Fritillaria thunbergii</i> Miq. Dry bulb、 <i>Ligustrum lucidum</i> W.T.Aiton, Dry mature fruit、 <i>Imperata cylindrica</i> (L.) Raeusch. Dry rhizome.                                                                                                                                                                                                                                                                                                                                                                                                                                         |
|           |       | <i>Polygonum multiflorum</i> Thunb. Dry root、 <i>Lycium barbarum</i> L. Dry mature fruit、 <i>Euryale ferox</i> Salisb. Dry mature kernels、 <i>Nelumbo nucifera</i> Gaertn. Dried stamen、 <i>Dioscorea opposita</i> Thunb.、 <i>Astragalus complanatus</i> Bunge, Dry mature seed、 <i>Tribulus terrestris</i> L. Dry mature fruit、 <i>Cuscuta chinensis</i> Lam. Dry mature seed、 <i>Psoralea corylifolia</i> L. Dry mature fruit、 <i>Allium aaseae</i> Ownbey, Dry mature seed、 <i>Rubus chingii</i> Hu, Dry fruit、 <i>Ginkgo biloba</i> L. Dry flesh、 <i>Dipsacus asper</i> Wall. ex C.B. Clarke, Dry root、 <i>Panax ginseng</i> C.A.Mey. Dried Root. |
|           |       | <i>Ginkgo biloba</i> L. Dry leave、 <i>Pueraria alopecuroides</i> Craib, Dry root、 <i>Siegesbeckiaorientalis</i> L.Dry aerial part、 <i>Diospyros kaki</i> L.f., Dry leaf.                                                                                                                                                                                                                                                                                                                                                                                                                                                                              |
|           |       | <i>Panax ginseng</i> C.A.Mey. Dried Root、 <i>Salvia miltiorrhiza</i> Bunge, Dry rhizome and root、 <i>Angelica sinensis</i> (Oliv.) Diels. Dried Root、 <i>Ligusticum acuminatum</i> Franch. Dry rhizome、 <i>Rehmannia glutinosa</i> (Gaertn.) DC. Dry root、 <i>Paeonia lactiflora</i> Pall, Dry root、 <i>Paeonia lactiflora</i> Pall. Dried root、 <i>Prunus persica</i> (L.) Batsch, Dry kernels、 <i>Carthamus tinctorius</i> L. Dry flower、 <i>Poria cocos</i> (Schw.) Wolf, Dried                                                                                                                                                                    |

|          |       |                                                                                                                                                                                                                                                                                                                                                                                                                                                                                                                                                                                     |
|----------|-------|-------------------------------------------------------------------------------------------------------------------------------------------------------------------------------------------------------------------------------------------------------------------------------------------------------------------------------------------------------------------------------------------------------------------------------------------------------------------------------------------------------------------------------------------------------------------------------------|
|          |       | Root、 <i>Aucklandia lappa</i> DC. Dry root、 <i>Citrus reticulata</i> Blanco, Dried fruit peel、 <i>Glycyrrhiza uralensis</i> Fisch. Dried Root, Honeyed.                                                                                                                                                                                                                                                                                                                                                                                                                             |
| 杨百方      | 凝冰散   | <i>Glycyrrhiza uralensis</i> Fisch. Dried Root, Honeyed、 <i>Astragalus aaronii</i> (Eig) Zohary, Dried Root、 <i>Codonopsis pilosula</i> (Franch.) Nannf, Dry root、 <i>Rehmannia glutinosa</i> (Gaertn.) DC. Dry root、 <i>Ophiopogon japonicus</i> (L.f) Ker-Gawl、 <i>Poria cocos</i> (Schw.) Wolf, Dried Root、 <i>Cinnamomum cassia</i> (L.) J.Presl, Dry twig、 <i>Paeonia lactiflora</i> Pall. Dried root、 <i>Curcuma longa</i> L, Dry root、 <i>Citrus medica</i> L. Dried fruit、 <i>Zingiber officinale</i> Roscoe, Fresh rhizome、 <i>Ziziphus jujuba</i> Mill. Dry mature fruit. |
| 《医醇剩义》卷二 | 苍玉潜龙汤 | <i>Rehmannia glutinosa</i> (Gaertn.) DC. Dry root、 <i>Chinemys reevesii</i> (Gray), Belly armor、 <i>Chinemys reevesii</i> (Gray), Belly armor、 <i>Moutan officinalis</i> (L.) Lindl. & Paxton, cortex、 <i>Saiga tatarica</i> Linnaeus、 <i>Glehnia littoralis</i> F.Schmidt ex Miq. Dry root、 <i>Paeonia lactiflora</i> Pall. Dried root                                                                                                                                                                                                                                             |
| 《医学入门》卷七 | 杜仲丸   | <i>Eucommia ulmoides</i> Oliv. Dry bark、 <i>Chinemys reevesii</i> (Gray), Belly armor、 <i>Phellodendron amurense</i> Rupr. Dried Root、 <i>Dioscorea opposita</i> Thunb.、 <i>Lycium barbarum</i> L. Dry mature fruit、 <i>Schisandra arisanensis</i> Hayata, Dry ripe fruit、 <i>Angelica sinensis</i> (Oliv.) Diels. Dried Root、 <i>Paeonia lactiflora</i> Pall, Dry root、 <i>Astragalus aaronii</i> (Eig) Zohary, Dried Root、 <i>Psoralea corylifolia</i> L. Dry mature fruit.                                                                                                       |
