# Supplementary material for: System Prediction and Validation of TCM for Chronic Myeloid Leukemia Treatment from the Perspective of Low‐Toxicity Chemotherapy: A Stilbene α‐Viniferin Has a Proapoptotic Effect on K562 Cells via the Mitochondrial Pathway
Source: Hindawi journal article supplement (doi:10.1155/2020/1986962), 2020-01-01
Supplement: f1 [file 1986962.f1.zip]

**Supplemental Table-2. Full ADME properties in silico of 121 candidate compounds via admetSAR Prediction**

| Compounds                    | Absorption |        | Metabolism (CYP450 isoforms Inhibitor) |        |         |        |        |            | Herbs               |
|------------------------------|------------|--------|----------------------------------------|--------|---------|--------|--------|------------|---------------------|
|                              | HIA        | Caco-2 | 1A2                                    | 2C9    | 2D6     | 2C19   | 3A4    | score      |                     |
| Majudin                      | 0.9933     | 0.6835 | 0.9774                                 | 0.8257 | 0.8931  | 0.9296 | 0.7959 | 3.48407919 | Notopterygium       |
|                              |            |        |                                        |        |         |        |        |            | incisum             |
|                              |            |        |                                        |        |         |        |        |            | K.C.Ting ex         |
|                              |            |        |                                        |        |         |        |        |            | H.T.Chang           |
| Bergaptin                    | 0.9964     | 0.5379 | 0.9107                                 | 0.8949 | 0.8931  | 0.8994 | 0.8123 | 3.47147818 | Notopterygium       |
|                              |            |        |                                        |        |         |        |        |            | incisum             |
|                              |            |        |                                        |        |         |        |        |            | K.C.Ting ex         |
|                              |            |        |                                        |        |         |        |        |            | H.T.Chang           |
| sesamin                      | 1          | 0.5774 | 0.9106                                 | 0.8949 | 0.8932  | 0.8994 | 0.796  | 3.46096872 | Stemona             |
|                              |            |        |                                        |        |         |        |        |            | sessilifolia        |
|                              |            |        |                                        |        |         |        |        |            | (Miq.) Miq.         |
|                              |            |        |                                        |        |         |        |        |            | Stemona             |
| suchilactone                 | 0.9884     | 0.7833 | 0.6598                                 | 0.9399 | 0.8096  | 0.9801 | 0.9591 | 3.39143188 | sessilifolia        |
|                              |            |        |                                        |        |         |        |        |            | (Miq.) Miq.         |
| isorhamnetin                 | 0.9783     | 0.8866 | 0.9218                                 | 0.756  | 0.6993  | 0.8648 | 0.7348 | 3.12557861 | Ginkgobiloba.       |
|                              |            |        |                                        |        |         |        |        |            | Notopterygium       |
| Ammidin                      | 0.9962     | 0.5187 | 0.8503                                 | 0.7199 | 0.7115  | 0.8977 | 0.7497 | 3.08492296 | incisum             |
|                              |            |        |                                        |        |         |        |        |            | K.C.Ting ex         |
|                              |            |        |                                        |        |         |        |        |            | H.T.Chang           |
|                              |            |        |                                        |        |         |        |        |            | Notopterygium       |
| 8-geranoxo-5-methoxypsoralen | 0.9924     | 0.5556 | 0.8058                                 | 0.7084 | 0.788   | 0.8398 | 0.7848 | 3.0808701  | incisum             |
|                              |            |        |                                        |        |         |        |        |            | K.C.Ting ex         |
|                              |            |        |                                        |        |         |        |        |            | H.T.Chang           |
|                              |            |        |                                        |        |         |        |        |            | Notopterygium       |
| Cnidilin                     | 0.9925     | 0.5243 | 0.8169                                 | 0.5477 | 0.641   | 0.8984 | 0.6951 | 2.82470425 | incisum             |
|                              |            |        |                                        |        |         |        |        |            | K.C.Ting ex         |
|                              |            |        |                                        |        |         |        |        |            | H.T.Chang           |
| naringenin                   | 0.967      | 0.7533 | 0.9106                                 | 0.8949 | -0.7463 | 0.8994 | 0.8988 | 2.12533827 | Smilax glabra Roxb. |
| Genkwanin                    | 0.9921     | 0.929  | 0.9378                                 | 0.9385 | -0.8253 | 0.9012 | 0.7232 | 2.00309141 | Ginkgobiloba.       |
| Diosmetin                    | 0.9783     | 0.8866 | 0.9218                                 | 0.756  | -0.6993 | 0.8648 | 0.7348 | 1.92963575 | Ginkgobiloba.       |
| Chryseriol                   | 0.9783     | 0.8866 | 0.9218                                 | 0.756  | -0.6993 | 0.8648 | 0.7348 | 1.92963575 | Ginkgobiloba.       |
| Kaempferid                   | 0.9783     | 0.8866 | 0.9218                                 | 0.756  | -0.6993 | 0.8648 | 0.7348 | 1.92963575 | Smilax china L.     |
| Syringetin                   | 0.9719     | 0.8896 | 0.8668                                 | 0.6258 | -0.6249 | 0.8187 | 0.7817 | 1.83717389 | Ginkgobiloba.       |
| 4'-methylpinosylvins         | 0.9968     | 0.9191 | 0.9614                                 | 0.903  | -0.8899 | 0.886  | 0.5    | 1.78240889 | Stemona             |
|                              |            |        |                                        |        |         |        |        |            | sessilifolia        |
|                              |            |        |                                        |        |         |        |        |            | (Miq.) Miq.         |
| Dehydrodieug                 | 0.9721     | 0.8004 | 0.744                                  | 0.797  | -0.7521 | 0.9261 | 0.6365 | 1.75847413 | Eucommia            |

|                                                   |        |        |        |         |         |        |         |            |                                                                                  |
|---------------------------------------------------|--------|--------|--------|---------|---------|--------|---------|------------|----------------------------------------------------------------------------------|
| enol                                              |        |        |        |         |         |        |         |            | ulmoides Oliv.                                                                   |
| Moracin M                                         | 0.9964 | 0.6043 | 0.9061 | 0.7842  | -0.8215 | 0.7031 | 0.804   | 1.74936332 | Smilax china L.<br>Eucommia<br>ulmoides Oliv.;<br>Moutan<br>officinalis (L.)     |
| kaempferol                                        | 0.9855 | 0.7447 | 0.9108 | 0.8948  | -0.9083 | 0.6434 | 0.7241  | 1.66803093 | Lindl. & Paxton,<br>cortex; Morus<br>alba L., twig,<br>dry;<br>Ginkgobiloba.     |
| morin                                             | 0.9855 | 0.7447 | 0.9108 | 0.8948  | -0.9083 | 0.6434 | 0.7241  | 1.66803093 | Morus alba L.,<br>twig, dry<br>Notopterygium                                     |
| notoptol                                          | 0.9762 | 0.5537 | 0.7233 | 0.7758  | -0.6654 | 0.7588 | 0.6368  | 1.66419893 | incisum<br>K.C.Ting ex<br>H.T.Chang                                              |
| Dihydroresveratrol                                | 0.9503 | 0.8604 | 0.7749 | 0.742   | -0.8326 | 0.8434 | 0.7201  | 1.65802923 | Smilax glabra<br>Roxb.<br>Smilax china L.;                                       |
| cis-resveratrol                                   | 0.9952 | 0.8915 | 0.9106 | 0.7068  | -0.9226 | 0.8052 | 0.7539  | 1.65443638 | Reynoutria<br>japonica Houtt.                                                    |
| cis-pinosylvin                                    | 0.9948 | 0.9014 | 0.9177 | 0.6648  | -0.9171 | 0.8322 | 0.6678  | 1.5974595  | Eucommia<br>ulmoides Oliv.                                                       |
| Oxysanguinarine                                   | 0.9841 | 0.7216 | 0.8373 | -0.8557 | 0.5126  | 0.7982 | 0.669   | 1.50874759 | Morus alba L.,<br>twig, dry<br>Paeonia anomala<br>L.; Moutan<br>officinalis (L.) |
| $\alpha$ -Viniferin                               | 1      | 0.6216 | 0.9277 | 0.9497  | -0.7239 | 0.8042 | -0.6358 | 1.13587144 | Lindl. & Paxton,<br>cortex;<br>Reynoutria<br>japonica Houtt.;<br>Ginkgobiloba.   |
| AIDS214634                                        | 0.5176 | 0.6408 | 0.6819 | 0.5427  | -0.8266 | 0.5876 | 0.542   | 1.10669817 | Eucommia<br>ulmoides Oliv.                                                       |
| Isoflavon                                         | 1      | 0.8727 | 0.9662 | 0.7441  | -0.9436 | 0.9213 | -0.6675 | 0.88838768 | Ginkgobiloba.                                                                    |
| 4,7-Dihydroxy-5-methoxyl-6-methyl-8-formyl-flavan | 0.9889 | 0.9077 | 0.7694 | 0.565   | -0.6802 | 0.7659 | -0.6223 | 0.71368052 | Smilax glabra<br>Roxb.                                                           |
| 6,8-Dihydroxy-7-methoxyxanthone                   | 0.9306 | 0.9044 | 0.9724 | -0.6549 | -0.6476 | 0.6923 | 0.6321  | 0.67863562 | Reynoutria<br>japonica Houtt.                                                    |

|                          |        |        |             |         |         |         |         |             |                                                                                                                                                                    |
|--------------------------|--------|--------|-------------|---------|---------|---------|---------|-------------|--------------------------------------------------------------------------------------------------------------------------------------------------------------------|
| 40957-99-1               | 0.9944 | 0.763  | -0.538<br>1 | 0.6912  | -0.8313 | 0.7443  | 0.5296  | 0.34602068  | Eucommia<br>ulmoides Oliv.                                                                                                                                         |
| (+)-medioresinol         | 0.9944 | 0.763  | -0.538<br>1 | 0.6912  | -0.8313 | 0.7443  | 0.5296  | 0.34602068  | Eucommia<br>ulmoides Oliv.                                                                                                                                         |
| Torachrysone             | 0.9803 | 0.92   | 0.9469      | -0.7326 | -0.8119 | 0.5056  | 0.5459  | 0.2491008   | Reynoutria<br>japonica Houtt.                                                                                                                                      |
| palmidin A               | 0.9932 | 0.6209 | 0.7561      | 0.7273  | -0.7856 | -0.5209 | -0.5122 | -0.22252461 | Rheum<br>palmatum L.                                                                                                                                               |
| aloe-emodin              | 0.9815 | 0.5847 | 0.7957      | 0.6696  | -0.766  | -0.5    | -0.7395 | -0.34954203 | Rheum<br>palmatum L.                                                                                                                                               |
| Morkit                   | 1      | 0.8682 | 0.9357      | 0.5919  | -0.6483 | -0.6245 | -0.9241 | -0.41647792 | Reynoutria<br>japonica Houtt.                                                                                                                                      |
| EUPATIN                  | 0.9854 | 0.8992 | 0.8642      | -0.6863 | -0.8329 | 0.6566  | -0.7237 | -0.49638525 | Rheum<br>palmatum L.                                                                                                                                               |
| Xanthotoxol              | 0.9811 | 0.6754 | 0.8392      | -0.7372 | -0.5847 | -0.6555 | 0.627   | -0.53089239 | Notopterygium<br>incisum<br>K.C.Ting ex<br>H.T.Chang                                                                                                               |
| Pterostilbene            | 0.9974 | 0.8911 | 0.8736      | -0.9304 | -0.9249 | 0.7583  | -0.5979 | -0.60006547 | Notopterygium<br>incisum<br>K.C.Ting ex<br>H.T.Chang                                                                                                               |
| Toralactone              | 0.808  | 0.9237 | 0.7076      | -0.6892 | -0.7022 | -0.7325 | 0.6957  | -0.71779906 | Rheum<br>palmatum L.                                                                                                                                               |
| Laricitrin               | 0.9482 | 0.6824 | 0.9091      | -0.7982 | -0.8687 | -0.6361 | 0.633   | -0.7462083  | Ginkgobiloba.                                                                                                                                                      |
| didehydrotuberostemonine | 1      | 0.6682 | 0.7281      | -0.5909 | -0.8438 | -0.6156 | 0.5101  | -0.76892367 | Stemona<br>sessilifolia<br>(Miq.) Miq.                                                                                                                             |
| luteolin                 | 0.965  | 0.8957 | 0.9106      | -0.5823 | -0.9287 | -0.9025 | 0.6951  | -0.79768769 | Reynoutria<br>japonica Houtt.;<br>Ginkgobiloba.                                                                                                                    |
| quercetin                | 0.965  | 0.8957 | 0.9106      | -0.5823 | -0.9287 | -0.9025 | 0.6951  | -0.79768769 | Eucommia<br>ulmoides Oliv.;<br>Reynoutria<br>japonica Houtt.;<br>Moutan<br>officinalis (L.)<br>Lindl. & Paxton,<br>cortex; Smilax<br>glabra Roxb.;<br>Ginkgobiloba |
| (-)-taxifolin            | 0.965  | 0.8957 | 0.9106      | -0.5823 | -0.9287 | -0.9025 | 0.6951  | -0.79768769 | Smilax glabra<br>Roxb.                                                                                                                                             |
| taxifolin                | 0.965  | 0.8957 | 0.9106      | -0.5823 | -0.9287 | -0.9025 | 0.6951  | -0.79768769 | Smilax china L.                                                                                                                                                    |

|                                                       |        |        |         |         |         |         |         |             |                                                         |
|-------------------------------------------------------|--------|--------|---------|---------|---------|---------|---------|-------------|---------------------------------------------------------|
|                                                       |        |        |         |         |         |         |         |             | Smilax glabra<br>Roxb.<br>Smilax china L.;              |
| cis-Dihydroquercetin                                  | 0.965  | 0.8957 | 0.9106  | -0.5823 | -0.9287 | -0.9025 | 0.6951  | -0.79768769 | Smilax glabra<br>Roxb.                                  |
| 2-(4-hydroxyphenyl)ethyl<br>4-methoxybenzoate         | 0.913  | 0.8278 | 0.6793  | -0.647  | -0.9494 | 0.6062  | -0.8666 | -0.84789435 | Notopterygium<br>incisum<br>K.C.Ting ex<br>H.T.Chang    |
| Procyanidin<br>B-5,3'-O-gallate                       | 0.6772 | 0.8786 | -0.9306 | -0.6236 | -0.9414 | 0.5937  | 0.8413  | -1.04234896 | Rheum<br>palmatum L.                                    |
| Erythraline                                           | 0.9903 | 0.7737 | -0.6103 | -0.9082 | 0.6973  | -0.7351 | -0.6481 | -1.63921898 | Eucommia<br>ulmoides Oliv.                              |
| bisdehydroneotuberostemonine                          | 1      | 0.7947 | 0.8351  | -0.7972 | -0.8819 | -0.7283 | -0.5961 | -1.684009   | Stemona<br>sessilifolia<br>(Miq.) Miq.<br>Notopterygium |
| Demethylfuropinnarin                                  | 0.986  | 0.5274 | -0.757  | -0.5341 | -0.7866 | -0.6967 | 0.8551  | -1.72717362 | incisum<br>K.C.Ting ex<br>H.T.Chang                     |
| (2R,8aS)-2,5,5,8a-tetramethyl-3,6-dihydro-2H-chromene | 1      | 0.7072 | -0.6951 | -0.541  | -0.896  | 0.6473  | -0.782  | -1.74929595 | Ginkgobiloba.                                           |
| bisdehydrostemoninine A                               | 1      | 0.6195 | 0.5846  | -0.6855 | -0.8956 | -0.6526 | -0.693  | -1.81177688 | Stemona<br>sessilifolia<br>(Miq.) Miq.                  |
| bisdehydrostemoninine B                               | 1      | 0.6195 | 0.5846  | -0.6855 | -0.8956 | -0.6526 | -0.693  | -1.81177688 | Stemona<br>sessilifolia<br>(Miq.) Miq.                  |
| Dipropylphthalate                                     | 0.976  | 0.7171 | 0.6006  | -0.6511 | -0.8898 | -0.5322 | -0.9319 | -1.82332052 | Paeonia anomala<br>L.                                   |
| Picralinal                                            | 0.9523 | 0.5762 | -0.6662 | 0.5     | -0.8749 | -0.5633 | -0.7786 | -1.84585895 | Reynoutria<br>japonica Houtt.<br>Notopterygium          |
| Guaiol                                                | 0.9971 | 0.6777 | -0.6113 | 0.5515  | -0.9198 | -0.5347 | -0.9156 | -1.86356377 | incisum<br>K.C.Ting ex<br>H.T.Chang                     |
| (Z)-1,3-di(phenyl)prop-2-en-1-one                     | 0.9868 | 0.7267 | -0.6793 | 0.7477  | -0.9424 | -0.6922 | -0.8629 | -1.87383447 | Ginkgobiloba.                                           |
| Mutatochrome                                          | 1      | 0.6964 | -0.5529 | -0.7813 | -0.9208 | 0.5353  | -0.8346 | -1.97145643 | Rheum<br>palmatum L.                                    |

|                                                                                                                                                                                                                                           |        |        |             |         |         |         |         |             |                                                          |
|-------------------------------------------------------------------------------------------------------------------------------------------------------------------------------------------------------------------------------------------|--------|--------|-------------|---------|---------|---------|---------|-------------|----------------------------------------------------------|
| Moutan<br>officinalis (L.)<br>Lindl. &<br>Paxton,<br>cortexoside-h<br>_qt 2                                                                                                                                                               | 1      | 0.8465 | 0.7765      | -0.9292 | -0.9619 | -0.5912 | -0.9796 | -2.04293318 | Moutan<br>officinalis (L.)<br>Lindl. & Paxton,<br>cortex |
| cis-Verbenyl<br>acetate                                                                                                                                                                                                                   | 1      | 0.7257 | -0.819<br>8 | -0.8266 | -0.8985 | 0.624   | -0.8518 | -2.14580769 | Notopterygium<br>incisum<br>K.C.Ting ex<br>H.T.Chang     |
| rhein                                                                                                                                                                                                                                     | 0.9689 | 0.6092 | -0.649<br>7 | 0.5     | -0.868  | -0.9233 | -0.9258 | -2.21140421 | Rheum<br>palmatum L.;<br>Reynoutria<br>japonica Houtt.   |
| stemonine                                                                                                                                                                                                                                 | 0.9969 | 0.6647 | 0.561       | -0.8532 | -0.9112 | -0.8372 | -0.832  | -2.21713706 | Stemona<br>sessilifolia<br>(Miq.) Miq.                   |
| stemoninine B                                                                                                                                                                                                                             | 0.9969 | 0.6647 | 0.561       | -0.8532 | -0.9112 | -0.8372 | -0.832  | -2.21713706 | Stemona<br>sessilifolia<br>(Miq.) Miq.                   |
| Enhydrin                                                                                                                                                                                                                                  | 0.9483 | 0.5168 | -0.532<br>8 | -0.8902 | -0.9273 | -0.8657 | 0.6247  | -2.23507203 | Smilax glabra<br>Roxb.                                   |
| dihydrostemo<br>ninine                                                                                                                                                                                                                    | 0.7795 | 0.7545 | 0.7434      | -0.9321 | -0.9603 | -0.8954 | -0.9422 | -2.29173649 | Stemona<br>sessilifolia<br>(Miq.) Miq.                   |
| Physovenine                                                                                                                                                                                                                               | 0.9963 | 0.5936 | -0.607<br>2 | -0.7115 | -0.7206 | -0.6225 | -0.61   | -2.5761631  | Reynoutria<br>japonica Houtt.                            |
| Isogoycycrol                                                                                                                                                                                                                              | 0.9421 | 0.5174 | -0.636<br>2 | -0.6707 | -0.7755 | -0.7514 | -0.7693 | -2.82058551 | Ginkgobiloba.                                            |
| 2H-3,9a-Meth<br>ano-1-benzox<br>epin-9-methan<br>ol,<br>octahydro-2,2,<br>5a-trimethyl-,<br>(3R-(3alpha,5<br>aalpha,9alpha,<br>9aalpha))<br>bis[(2S)-2-eth<br>ylhexyl]<br>benzene-1,2-d<br>icarboxylate<br>(1R,2R)-1,2-D<br>iphenylethyle | 1      | 0.596  | -0.773<br>6 | -0.5085 | -0.9158 | -0.5554 | -0.9291 | -2.86765646 | Smilax glabra<br>Roxb.                                   |
|                                                                                                                                                                                                                                           | 0.9797 | 0.7003 | -0.653<br>9 | -0.7448 | -0.8432 | -0.631  | -0.8309 | -2.89507119 | Ginkgobiloba.                                            |
|                                                                                                                                                                                                                                           | 0.935  | 0.6935 | -0.723<br>3 | -0.5862 | -0.9209 | -0.6888 | -0.7833 | -2.90673728 | Ginkgobiloba.                                            |

|                                                                                   |        |        |             |         |         |         |         |             |                                                                                |
|-----------------------------------------------------------------------------------|--------|--------|-------------|---------|---------|---------|---------|-------------|--------------------------------------------------------------------------------|
| nediamine                                                                         |        |        |             |         |         |         |         |             |                                                                                |
| olivil                                                                            | 0.9607 | 0.5748 | -0.746      | -0.7071 | -0.9041 | -0.6443 | -0.7101 | -2.92474861 | Eucommia<br>ulmoides Oliv.                                                     |
| 6'-Feruloylnod<br>akenin                                                          | 0.593  | 0.8264 | -0.735<br>6 | -0.6762 | -0.8667 | -0.5911 | -0.9088 | -2.94483359 | Notopterygium<br>incisum<br>K.C.Ting ex<br>H.T.Chang                           |
| DBP                                                                               | 0.9941 | 0.6564 | -0.592      | -0.897  | -0.5245 | -0.9265 | -0.8539 | -2.94698555 | Ginkgobiloba.                                                                  |
| PIT                                                                               | 0.7874 | 0.5717 | -0.641<br>6 | -0.7426 | -0.8602 | -0.7117 | -0.8345 | -2.9651409  | Rheum<br>palmatum L.                                                           |
| Marmesin                                                                          | 0.9881 | 0.7636 | -0.671<br>7 | -0.7486 | -0.827  | -0.7313 | -0.8285 | -2.97800069 | Notopterygium<br>incisum<br>K.C.Ting ex<br>H.T.Chang                           |
| (8S)-8-(2-hydr<br>oxypropan-2-<br>yl)-8,9-dihydr<br>ofuro[2,3-h]ch<br>romen-2-one | 0.9881 | 0.7636 | -0.671<br>7 | -0.7486 | -0.827  | -0.7313 | -0.8285 | -2.97800069 | Notopterygium<br>incisum<br>K.C.Ting ex<br>H.T.Chang                           |
| nodakenetin                                                                       | 0.9881 | 0.7636 | -0.671<br>7 | -0.7486 | -0.827  | -0.7313 | -0.8285 | -2.97800069 | Notopterygium<br>incisum<br>K.C.Ting ex<br>H.T.Chang                           |
| copaene                                                                           | 1      | 0.6705 | -0.824<br>4 | -0.6794 | -0.9197 | -0.5547 | -0.8317 | -2.98601895 | Notopterygium<br>incisum<br>K.C.Ting ex<br>H.T.Chang                           |
| DIBP                                                                              | 0.9745 | 0.7151 | -0.566<br>6 | -0.6604 | -0.9218 | -0.7906 | -0.8983 | -2.99550166 | Ginkgobiloba.                                                                  |
| isoengelitin                                                                      | 0.9051 | 0.7493 | -0.530<br>6 | -0.8538 | -0.9547 | -0.8339 | -0.7109 | -3.06337419 | Smilax china L.;                                                               |
| Engelitin                                                                         | 0.9051 | 0.7493 | -0.530<br>6 | -0.8538 | -0.9547 | -0.8339 | -0.7109 | -3.06337419 | Smilax glabra<br>Roxb.                                                         |
| astilbin                                                                          | 0.9051 | 0.7493 | -0.530<br>6 | -0.8538 | -0.9547 | -0.8339 | -0.7109 | -3.06337419 | Smilax china L.                                                                |
| Neoastilbin                                                                       | 0.9051 | 0.7493 | -0.530<br>6 | -0.8538 | -0.9547 | -0.8339 | -0.7109 | -3.06337419 | Smilax china L.;                                                               |
| β-cedrene                                                                         | 0.9954 | 0.6484 | -0.761<br>3 | -0.7311 | -0.9271 | -0.7087 | -0.8805 | -3.13789978 | Smilax glabra<br>Roxb.                                                         |
| diversoside_qt                                                                    | 0.6685 | 0.8787 | -0.687      | -0.7973 | -0.9165 | -0.7401 | -0.918  | -3.17110414 | Smilax glabra<br>Roxb.<br>Notopterygium<br>incisum<br>K.C.Ting ex<br>H.T.Chang |

|                                                                                                                                                                 |        |        |             |         |         |         |         |             |                                                                                           |
|-----------------------------------------------------------------------------------------------------------------------------------------------------------------|--------|--------|-------------|---------|---------|---------|---------|-------------|-------------------------------------------------------------------------------------------|
|                                                                                                                                                                 |        |        | 3           |         |         |         |         |             | incisum<br>K.C.Ting ex<br>H.T.Chang                                                       |
| hirsutin_qt                                                                                                                                                     | 0.8588 | 0.5    | -0.694<br>8 | -0.8465 | -0.8465 | -0.7712 | -0.964  | -3.21152389 | Eucommia<br>ulmoides Oliv.                                                                |
| Daucosterol_q<br>t                                                                                                                                              | 0.8788 | 0.8336 | -0.805<br>2 | -0.7682 | -0.9187 | -0.8388 | -0.7938 | -3.24509009 | Rheum<br>palmatum L.                                                                      |
| (-)-alpha-cedr<br>ene                                                                                                                                           | 1      | 0.6555 | -0.797<br>6 | -0.7774 | -0.929  | -0.7584 | -0.8897 | -3.2521838  | Paeonia anomala<br>L.                                                                     |
| nodakenin                                                                                                                                                       | 0.7967 | 0.8705 | -0.693<br>2 | -0.868  | -0.9033 | -0.8343 | -0.8892 | -3.27860349 | Notopterygium<br>incisum<br>K.C.Ting ex<br>H.T.Chang                                      |
| benzoylpaeoni<br>florin                                                                                                                                         | 0.6197 | 0.8556 | -0.873<br>2 | -0.8869 | -0.9338 | -0.7759 | -0.8118 | -3.3695257  | Paeonia anomala<br>L.                                                                     |
| Torachrysone-<br>8-O-beta-D-(6<br>'-oxayl)-gluco<br>side                                                                                                        | 0.7886 | 0.7989 | -0.688<br>2 | -0.8912 | -0.917  | -0.9199 | -0.908  | -3.38591486 | Rheum<br>palmatum L.;<br>Reynoutria<br>japonica Houtt.                                    |
| albiflorin_qt                                                                                                                                                   | 0.7098 | 0.8668 | -0.892<br>7 | -0.8984 | -0.9399 | -0.8197 | -0.8046 | -3.43048168 | Paeonia anomala<br>L.                                                                     |
| paeoniflorin                                                                                                                                                    | 0.8238 | 0.8487 | -0.883<br>4 | -0.9006 | -0.9314 | -0.7995 | -0.8545 | -3.433317   | Paeonia anomala<br>L.                                                                     |
| paeoniflorin_q<br>t                                                                                                                                             | 0.8238 | 0.8487 | -0.883<br>4 | -0.9006 | -0.9314 | -0.7995 | -0.8545 | -3.433317   | Paeonia anomala<br>L.; Moutan<br>officinalis (L.)<br>Lindl. & Paxton,<br>cortex<br>Moutan |
| 4-O-methylpa<br>eoniflorin_qt                                                                                                                                   | 0.6133 | 0.8067 | -0.881<br>6 | -0.8915 | -0.9323 | -0.8    | -0.8696 | -3.43546595 | officinalis (L.)<br>Lindl. & Paxton,<br>cortex                                            |
| (3S,5R,8R,9R,<br>10S,14S)-3,17<br>-dihydroxy-4,<br>4,8,10,14-pent<br>amethyl-2,3,5,<br>6,7,9-hexahyd<br>ro-1H-cyclope<br>nta[a]phenant<br>hrene-15,16-di<br>one | 0.997  | 0.6592 | -0.882<br>5 | -0.8505 | -0.9601 | -0.8399 | -0.8531 | -3.44859012 | Paeonia anomala<br>L.                                                                     |
| paeonidanin_q<br>t                                                                                                                                              | 0.6484 | 0.8203 | -0.894<br>5 | -0.88   | -0.9411 | -0.8085 | -0.868  | -3.45009366 | Moutan<br>officinalis (L.)                                                                |

|                                                     |        |        |             |         |         |         |         |             |                                                                                                                                    |
|-----------------------------------------------------|--------|--------|-------------|---------|---------|---------|---------|-------------|------------------------------------------------------------------------------------------------------------------------------------|
|                                                     |        |        |             |         |         |         |         |             | Lindl. & Paxton,<br>cortex                                                                                                         |
| paeoniflorgen<br>one                                | 0.9811 | 0.6976 | -0.887<br>2 | -0.8919 | -0.9494 | -0.8415 | -0.8208 | -3.4569193  | Paeonia anomala<br>L.                                                                                                              |
| diosgenin                                           | 0.9961 | 0.5872 | -0.863<br>8 | -0.8878 | -0.9107 | -0.9127 | -0.8309 | -3.46533455 | Smilax china L.;<br>Smilax glabra<br>Roxb.                                                                                         |
| Lactiflorin                                         | 0.5395 | 0.8577 | -0.899<br>7 | -0.8963 | -0.9457 | -0.7886 | -0.9046 | -3.47891244 | Paeonia anomala<br>L.                                                                                                              |
| L-Bornyl<br>acetate                                 | 0.9969 | 0.7743 | -0.931<br>7 | -0.9218 | -0.9606 | -0.7031 | -0.9384 | -3.49110903 | Notopterygium<br>incisum<br>K.C.Ting ex<br>H.T.Chang;<br>Smilax glabra<br>Roxb.                                                    |
| gallic<br>acid-3-O-(6'-<br>O-galloyl)-glu<br>coside | 0.8558 | 0.898  | -0.931<br>5 | -0.7955 | -0.9425 | -0.9121 | -0.8723 | -3.49989554 | Rheum<br>palmatum L.                                                                                                               |
| (-)-Tabernemo<br>ntanine                            | 1      | 0.5706 | -0.904<br>5 | -0.907  | -0.9231 | -0.9025 | -0.8309 | -3.51627556 | Eucommia<br>ulmoides Oliv.                                                                                                         |
| ent-Epicatechi<br>n                                 | 0.9654 | 0.8956 | -0.904<br>6 | -0.9071 | -0.9231 | -0.9041 | -0.8309 | -3.51772585 | Eucommia<br>ulmoides Oliv.                                                                                                         |
| (-)-catechin                                        | 0.9654 | 0.8956 | -0.904<br>6 | -0.9071 | -0.9231 | -0.9041 | -0.8309 | -3.51772585 | Rheum<br>palmatum L.;<br>Ginkgobiloba<br>Paeonia anomala<br>L.; Moutan<br>officinalis (L.)                                         |
| (+)-catechin                                        | 0.9654 | 0.8956 | -0.904<br>6 | -0.9071 | -0.9231 | -0.9041 | -0.8309 | -3.51772585 | Lindl. & Paxton,<br>cortex;<br>Reynoutria<br>japonica Houtt.;<br>Ginkgobiloba.<br>Smilax china L.;<br>Paeonia anomala<br>L.; Rheum |
| beta-sitosterol                                     | 1      | 0.7953 | -0.929<br>1 | -0.9125 | -0.9346 | -0.9025 | -0.8309 | -3.55056073 | palmatum L.;<br>Reynoutria<br>japonica Houtt.;<br>Smilax glabra<br>Roxb.                                                           |
| sitosterol                                          | 1      | 0.7953 | -0.929<br>1 | -0.9125 | -0.9346 | -0.9025 | -0.8309 | -3.55056073 | Smilax china L.;<br>Paeonia anomala                                                                                                |



|                           |        |        |             |         |         |         |         |             |                                                                                                                                                                                       |
|---------------------------|--------|--------|-------------|---------|---------|---------|---------|-------------|---------------------------------------------------------------------------------------------------------------------------------------------------------------------------------------|
|                           |        |        |             |         |         |         |         |             | L.; Moutan officinalis (L.)<br>Lindl. & Paxton, cortex;<br>Notopterygium incisum<br>K.C.Ting ex H.T.Chang;<br>Smilax glabra Roxb.<br>Smilax glabra Roxb.;                             |
| Stigmasterol              | 1      | 0.7953 | -0.929<br>1 | -0.9125 | -0.9346 | -0.9025 | -0.8309 | -3.55056073 | Ginkgobiloba.<br>Paeonia anomala L.; Moutan officinalis (L.)<br>Lindl. & Paxton, cortex<br>Smilax china L.;<br>Paeonia anomala L.; Moutan officinalis (L.)<br>Lindl. & Paxton, cortex |
| Mairin                    | 0.9952 | 0.8835 | -0.916<br>7 | -0.9071 | -0.9554 | -0.9025 | -0.8309 | -3.55391481 | Smilax china L.;<br>Paeonia anomala L.; Moutan officinalis (L.)<br>Lindl. & Paxton, cortex                                                                                            |
| oleanolic acid            | 1      | 0.8353 | -0.916<br>9 | -0.9071 | -0.9485 | -0.9025 | -0.8695 | -3.57307456 | Smilax china L.                                                                                                                                                                       |
| pseudoprotodi<br>oscin_qt | 0.6254 | 0.8883 | -0.884<br>8 | -0.9118 | -0.936  | -0.9113 | -0.946  | -3.59643242 | Smilax china L.                                                                                                                                                                       |
| methylprotodi<br>oscin_qt | 0.5247 | 0.8488 | -0.892<br>1 | -0.9148 | -0.9364 | -0.8976 | -0.9573 | -3.60138169 | Rheum palmatum L.<br>Rheum palmatum L.;<br>Reynoutria japonica Houtt.                                                                                                                 |
| 1-O-Galloyl-g<br>lycerol  | 0.7501 | 0.8336 | -0.764<br>2 | -0.973  | -0.9622 | -0.9726 | -0.9526 | -3.6232814  | Ginkgobiloba.<br>Smilax china L.;                                                                                                                                                     |
| Physciondiglu<br>coside   | 0.7916 | 0.8674 | -0.916<br>7 | -0.9167 | -0.9519 | -0.9109 | -0.9311 | -3.6300136  | Morus alba L.,<br>twig, dry<br>Rheum palmatum L.                                                                                                                                      |
| Luteolin-4'-gl<br>ucoside | 0.7855 | 0.9398 | -0.908<br>4 | -0.9296 | -0.9513 | -0.9289 | -0.9193 | -3.63996795 | Rheum palmatum L.                                                                                                                                                                     |
| Cudranin                  | 0.7855 | 0.9398 | -0.908<br>4 | -0.9296 | -0.9513 | -0.9289 | -0.9193 | -3.63996795 | Rheum palmatum L.                                                                                                                                                                     |
| Sennoside<br>E_qt         | 0.5493 | 0.9338 | -0.932      | -0.9171 | -0.9596 | -0.9032 | -0.9365 | -3.64666492 | Rheum palmatum L.                                                                                                                                                                     |
| Sennoside<br>D_qt         | 0.5493 | 0.9338 | -0.932      | -0.9171 | -0.9596 | -0.9032 | -0.9365 | -3.64666492 | Ginkgobiloba.                                                                                                                                                                         |
| 6-Hydroxykyn              | 0.9193 | 0.6778 | -0.897      | -0.9167 | -0.9492 | -0.9641 | -0.9666 | -3.67756296 |                                                                                                                                                                                       |
