# Supplementary material for: System Prediction and Validation of TCM for Chronic Myeloid Leukemia Treatment from the Perspective of Low‐Toxicity Chemotherapy: A Stilbene α‐Viniferin Has a Proapoptotic Effect on K562 Cells via the Mitochondrial Pathway
Source: Hindawi journal article supplement (doi:10.1155/2020/1986962), 2020-01-01
Supplement: f1 [file 1986962.f1.zip]

**Supplemental Table-4. Literature mining of 32 candidate compounds**

| Classification | Compound                                         | CID   | Literatures                                                                                                                                                                                                                                                                             |
|----------------|--------------------------------------------------|-------|-----------------------------------------------------------------------------------------------------------------------------------------------------------------------------------------------------------------------------------------------------------------------------------------|
| Flavones       | naringenin                                       | 932   | Li R , Feng Y , Chen J , et al. Naringenin suppresses K562 human leukemia cell proliferation and ameliorates Adriamycin-induced oxidative damage in polymorphonuclear leukocytes[J]. Experimental and Therapeutic Medicine, 2015, 9(3):697---706.                                       |
|                |                                                  |       | Liu X , Ye F , Wu J , et al. Signaling Proteins and Pathways Affected by Flavonoids in Leukemia Cells[J]. Nutrition and Cancer, 2015, 67(2):238-249.                                                                                                                                    |
|                |                                                  |       | Zhang S J , Sun D , Hao J B , et al. The effect of dietary soyabean isoflavones on photodynamic therapy in K562 leukemia cells[J]. Journal of Photochemistry & Photobiology B Biology, 2012, 110(none):28-33.                                                                           |
|                | Isoflavon                                        | 72304 | Zhang D , Zhuang Y , Pan J , et al. Investigation of Effects and Mechanisms of Total Flavonoids of <i>Astragalus</i> , and Calycosin on Human Erythroleukemia Cells[J]. Oxidative Medicine and Cellular Longevity, 2012, 2012:1-5.                                                      |
|                |                                                  |       | Zhang D , Zhuang Y , Pan J , et al. Investigation of Effects and Mechanisms of Total Flavonoids of <i>Astragalus</i> , and Calycosin on Human Erythroleukemia Cells[J]. Oxidative Medicine and Cellular Longevity, 2012, 2012:1-5.                                                      |
|                | 4,7-Dihydroxy-5-methoxy-6-methyl-8-formyl-flavan | 12939 | Ninomiya M , Nishida K , Kaori Tanaka .... Structure–activity relationship studies of 5,7-dihydroxyflavones as naturally occurring inhibitors of cell proliferation in human leukemia HL-60 cells[J]. Journal of Natural Medicines, 2013, 67(3):460-467.                                |
|                |                                                  |       | Gatouillat, Grégory, Alabdul Magid A , Bertin E , et al. Cytotoxicity and Apoptosis Induced by Alfalfa ( <i>Medicago sativa</i> ) Leaf Extracts in Sensitive and Multidrug-Resistant Tumor Cells[J]. Nutrition and Cancer, 2014, 66(3):483-491.                                         |
|                | Chryseriol                                       | 52806 | Marfe G , Tafani M , Indelicato M , et al. Kaempferol induces apoptosis in Two different cell lines Via Akt inactivation, Bax and SIRT3 activation, and mitochondrial dysfunction[J]. Journal of Cellular Biochemistry, 2009, 106(4):643-650.                                           |
|                |                                                  |       | Okoye F B C , Sawadogo W R , Sendker J , et al. Flavonoid glycosides from <i>Olax mannii</i> : Structure elucidation and effect on the nuclear factor kappa B pathway[J]. Journal of Ethnopharmacology, 2015, 176(Complete):27-34.                                                      |
|                | kaempferol                                       | 52808 | Roma A , Rota S G , Spagnuolo P A . Diosmetin Induces Apoptosis of Acute Myeloid Leukemia Cells[J]. Molecular Pharmaceutics, 2018:acs.molpharmaceut.7b01151.                                                                                                                            |
|                |                                                  |       | Sghaier M B , Skandrani I , Nasr N , et al. Flavonoids and sesquiterpenes from <i>Tecurium ramosissimum</i> promote antiproliferation of human cancer cells and enhance antioxidant activity: A structure–activity relationship study[J]. Environ Toxicol Pharmacol, 2011, 32(3):0-348. |
|                | Diosmetin                                        | 52816 | Zahir A , Jossang A , Bodo B , et al. DNA topoisomerase I inhibitors:                                                                                                                                                                                                                   |
|                |                                                  |       |                                                                                                                                                                                                                                                                                         |
|                | Genkwanin                                        | 52816 |                                                                                                                                                                                                                                                                                         |
|                |                                                  |       |                                                                                                                                                                                                                                                                                         |

|           |                                 |               |                                                                                                                                                                                                                                                                                                                                                                                                                                                                                                                                                                                                                                                                |
|-----------|---------------------------------|---------------|----------------------------------------------------------------------------------------------------------------------------------------------------------------------------------------------------------------------------------------------------------------------------------------------------------------------------------------------------------------------------------------------------------------------------------------------------------------------------------------------------------------------------------------------------------------------------------------------------------------------------------------------------------------|
|           |                                 |               | cytotoxic flavones from <i>Lethedon tannaensis</i> [J]. <i>Journal of Natural Products</i> , 1996, 59(7):701-3.                                                                                                                                                                                                                                                                                                                                                                                                                                                                                                                                                |
|           | Kaempferid                      | 52816<br>66   | not founded                                                                                                                                                                                                                                                                                                                                                                                                                                                                                                                                                                                                                                                    |
|           | morin                           | 52816<br>70   | Park C , Lee W S , Go S I , et al. Morin, a Flavonoid from Moraceae, Induces Apoptosis by Induction of BAD Protein in Human Leukemic Cells[J]. <i>International Journal of Molecular Sciences</i> , 2014, 16(1):645.<br>Ikegawa T , Ohtani H , Koyabu N , et al. Inhibition of P-glycoprotein by flavonoid derivatives in adriamycin-resistant human myelogenous leukemia (K562/ADM) cells[J]. <i>Cancer Letters</i> , 2002, 177(1):89-93.                                                                                                                                                                                                                     |
|           | Syringetin                      | 52819<br>53   | Hibasami H , Mitani A , Katsuzaki H , et al. Isolation of five types of flavonol from seabuckthorn ( <i>Hippophae rhamnoides</i> ) and induction of apoptosis by some of the flavonols in human promyelotic leukemia HL-60 cells[J]. <i>International Journal of Molecular Medicine</i> , 2005, 15(5):805---809.                                                                                                                                                                                                                                                                                                                                               |
|           | 6,8-Dihydroxy-7-methoxyxanthone | 53167<br>98   | not founded                                                                                                                                                                                                                                                                                                                                                                                                                                                                                                                                                                                                                                                    |
|           | isorhamnetin                    | 53186<br>45   | Wu Xunxun,Chen Xiaofei,Dan Jia,Cao Yan,Gao Shouhong,Guo Zhiying,Zerbe Philipp,Chai Yifeng,Diao Yong,Zhang Lei. Characterization of anti-leukemia components from <i>Indigo naturalis</i> using comprehensive two-dimensional K562/cell membrane chromatography and in silico target identification.[J]. <i>Scientific reports</i> ,2016,6.<br>Hibasami H , Mitani A , Katsuzaki H , et al. Isolation of five types of flavonol from seabuckthorn ( <i>Hippophae rhamnoides</i> ) and induction of apoptosis by some of the flavonols in human promyelotic leukemia HL-60 cells[J]. <i>International Journal of Molecular Medicine</i> , 2005, 15(5):805---809. |
|           | suchilactone                    | 13235<br>0840 | not founded                                                                                                                                                                                                                                                                                                                                                                                                                                                                                                                                                                                                                                                    |
| stilbenes |                                 |               |                                                                                                                                                                                                                                                                                                                                                                                                                                                                                                                                                                                                                                                                |
|           | Dihydroresveratrol              | 18591<br>4    | not founded                                                                                                                                                                                                                                                                                                                                                                                                                                                                                                                                                                                                                                                    |
|           | $\alpha$ -Viniferin             | 19640<br>2    | not founded                                                                                                                                                                                                                                                                                                                                                                                                                                                                                                                                                                                                                                                    |
|           | cis-resveratrol                 | 15489<br>10   | Thikrayat A A , Madihally S V . Influence of controlled release of resveratrol from electrospun fibers in combination with siRNA on leukemia cells[J]. <i>European Journal of Pharmaceutical Sciences</i> , 2018, 123:173-183.<br>Wu X P , Xiong M , Xu C S , et al. Resveratrol induces apoptosis of human chronic myelogenous leukemia cells in vitro through p38 and JNK-regulated H2AX phosphorylation[J]. <i>Acta Pharmacologica Sinica</i> , 2015, 36(3):353-361.                                                                                                                                                                                        |
|           | cis-pinosylvin                  | 95488<br>40   | not founded                                                                                                                                                                                                                                                                                                                                                                                                                                                                                                                                                                                                                                                    |
|           | 4'-methylpinosylvin             | 44566<br>996  | not founded                                                                                                                                                                                                                                                                                                                                                                                                                                                                                                                                                                                                                                                    |
| Coumarins |                                 |               |                                                                                                                                                                                                                                                                                                                                                                                                                                                                                                                                                                                                                                                                |
|           | Majudin                         | 2355          | not founded                                                                                                                                                                                                                                                                                                                                                                                                                                                                                                                                                                                                                                                    |

|                       |                                  |             |                                                                                                                                                                                              |
|-----------------------|----------------------------------|-------------|----------------------------------------------------------------------------------------------------------------------------------------------------------------------------------------------|
|                       | Ammidin                          | 10212       | not founded                                                                                                                                                                                  |
|                       | Cnidilin                         | 82144<br>9  | not founded                                                                                                                                                                                  |
|                       | notoptol                         | 53202<br>28 | not founded                                                                                                                                                                                  |
|                       | Bergaptin                        | 54713<br>49 | not founded                                                                                                                                                                                  |
|                       | 8-geranoxy-5-methoxy<br>psoralen | 64421<br>82 | not founded                                                                                                                                                                                  |
| Others                |                                  |             |                                                                                                                                                                                              |
| Biphenyls             | Dehydrodieugenol                 | 16522<br>5  | not founded                                                                                                                                                                                  |
| Lignin                | (+)-medioresinol<br>(40957-99-1) | 18168<br>1  | Park H J , Lee M S , Lee K T , et al. Studies on Constituents with Cytotoxic Activity from the Stem Bark of Syringa velutina.[J]. CHEMICAL & PHARMACEUTICAL BULLETIN, 1999, 47(7):1029-1031. |
| benzofuran            | Moracin M                        | 18584<br>8  | not founded                                                                                                                                                                                  |
| Quinones              | AIDS214634                       | 21463<br>4  | not founded                                                                                                                                                                                  |
| Hydroxyhemo<br>globin | Oxysanguinarine                  | 44371<br>6  | not founded                                                                                                                                                                                  |
| Solanine              | Torachrysone                     | 53219<br>77 | not founded                                                                                                                                                                                  |
