# Supplementary material for: System Prediction and Validation of TCM for Chronic Myeloid Leukemia Treatment from the Perspective of Low‐Toxicity Chemotherapy: A Stilbene α‐Viniferin Has a Proapoptotic Effect on K562 Cells via the Mitochondrial Pathway
Source: Hindawi journal article supplement (doi:10.1155/2020/1986962), 2020-01-01
Supplement: f1 [file 1986962.f1.zip]

Supplemental Table-3. Intersection of CML Targets and Prediction Targets

| OFFICIAL_GENE_SYMBOL | Gene Name                                                      | Related Genes | Species      |
|----------------------|----------------------------------------------------------------|---------------|--------------|
| ABCB1                | ATP binding cassette subfamily B member 1(ABCB1)               | RG            | Homo sapiens |
| ACHE                 | acetylcholinesterase (Cartwright blood group)(ACHE)            | RG            | Homo sapiens |
| ADRB1                | adrenoceptor beta 1(ADRB1)                                     | RG            | Homo sapiens |
| ADRB2                | adrenoceptor beta 2(ADRB2)                                     | RG            | Homo sapiens |
| ALOX5                | arachidonate 5-lipoxygenase(ALOX5)                             | RG            | Homo sapiens |
| AR                   | androgen receptor(AR)                                          | RG            | Homo sapiens |
| BCL2                 | BCL2, apoptosis regulator(BCL2)                                | RG            | Homo sapiens |
| CA2                  | carbonic anhydrase 2(CA2)                                      | RG            | Homo sapiens |
| CCL2                 | C-C motif chemokine ligand 2(CCL2)                             | RG            | Homo sapiens |
| DRD3                 | dopamine receptor D3(DRD3)                                     | RG            | Homo sapiens |
| ECE1                 | endothelin converting enzyme 1(ECE1)                           | RG            | Homo sapiens |
| EGF                  | epidermal growth factor(EGF)                                   | RG            | Homo sapiens |
| EGFR                 | epidermal growth factor receptor(EGFR)                         | RG            | Homo sapiens |
| F2                   | coagulation factor II, thrombin(F2)                            | RG            | Homo sapiens |
| F7                   | coagulation factor VII(F7)                                     | RG            | Homo sapiens |
| G6PD                 | glucose-6-phosphate dehydrogenase(G6PD)                        | RG            | Homo sapiens |
| GABRA2               | gamma-aminobutyric acid type A receptor alpha2 subunit(GABRA2) | RG            | Homo sapiens |
| GSTM1                | glutathione S-transferase mu 1(GSTM1)                          | RG            | Homo sapiens |
| HGF                  | hepatocyte growth factor(HGF)                                  | RG            | Homo sapiens |
| HTR2A                | 5-hydroxytryptamine receptor 2A(HTR2A)                         | RG            | Homo sapiens |
| IFNG                 | interferon gamma(IFNG)                                         | RG            | Homo sapiens |
| IL1B                 | interleukin 1 beta(IL1B)                                       | RG            | Homo sapiens |
| IL6                  | interleukin 6(IL6)                                             | RG            | Homo sapiens |
| INSR                 | insulin receptor(INSR)                                         | RG            | Homo sapiens |
| KCNH2                | potassium voltage-gated channel subfamily H member 2(KCNH2)    | RG            | Homo sapiens |
| KDR                  | kinase insert domain receptor(KDR)                             | RG            | Homo sapiens |
| LDLR                 | low density lipoprotein receptor(LDLR)                         | RG            | Homo sapiens |
| MMP1                 | matrix metalloproteinase 1(MMP1)                               | RG            | Homo sapiens |
| MMP2                 | matrix metalloproteinase 2(MMP2)                               | RG            | Homo sapiens |
| MMP3                 | matrix metalloproteinase 3(MMP3)                               | RG            | Homo sapiens |
| MPO                  | myeloperoxidase(MPO)                                           | RG            | Homo sapiens |
| MTOR                 | mechanistic target of rapamycin(MTOR)                          | RG            | Homo sapiens |
| NOS3                 | nitric oxide synthase 3(NOS3)                                  | RG            | Homo sapiens |
| NQO1                 | NAD(P)H quinone dehydrogenase 1(NQO1)                          | RG            | Homo sapiens |
| NQO2                 | NAD(P)H quinone dehydrogenase 2(NQO2)                          | RG            | Homo sapiens |
| NR3C1                | nuclear receptor subfamily 3 group C member 1(NR3C1)           | RG            | Homo sapiens |
| PLAU                 | plasminogen activator, urokinase(PLAU)                         | RG            | Homo sapiens |
| PPARG                | peroxisome proliferator activated receptor gamma(PPARG)        | RG            | Homo sapiens |

|        |                                                             |    |              |
|--------|-------------------------------------------------------------|----|--------------|
| PTPN1  | protein tyrosine phosphatase, non-receptor type<br>1(PTPN1) | RG | Homo sapiens |
| PYGM   | phosphorylase, glycogen, muscle(PYGM)                       | RG | Homo sapiens |
| SCN5A  | sodium voltage-gated channel alpha subunit 5(SCN5A)         | RG | Homo sapiens |
| SELE   | selectin E(SELE)                                            | RG | Homo sapiens |
| SLC6A3 | solute carrier family 6 member 3(SLC6A3)                    | RG | Homo sapiens |
| SLC6A4 | solute carrier family 6 member 4(SLC6A4)                    | RG | Homo sapiens |
| SOD1   | superoxide dismutase 1, soluble(SOD1)                       | RG | Homo sapiens |
| THBD   | thrombomodulin(THBD)                                        | RG | Homo sapiens |
| TNF    | tumor necrosis factor(TNF)                                  | RG | Homo sapiens |
| TOP1   | topoisomerase (DNA) I(TOP1)                                 | RG | Homo sapiens |
| TP53   | tumor protein p53(TP53)                                     | RG | Homo sapiens |
