# Supplementary material for: System Prediction and Validation of TCM for Chronic Myeloid Leukemia Treatment from the Perspective of Low-Toxicity Chemotherapy: A Stilbene α-Viniferin Has a Proapoptotic Effect on K562 Cells via the Mitochondrial Pathway
Source: Evid Based Complement Alternat Med. 2020 Feb 10;2020:1986962. doi: 10.1155/2020/1986962 (PMC7035520; doi:10.1155/2020/1986962)
Supplement: Supplementary Materials — Supplemental Table 1: TCM prescriptions for CML. Supplemental Table 2: full ADME properties in silico of 121 candidate compounds via admetSAR Prediction. Supplemental Table 3: intersection of CML targets and prediction Targets. Supplemental Table 4: literature mining of 32 active compounds. Supplemental Table 5: NCI Cancer Screen Data of 32 candidate compounds on K562 cells. Supplemental Figure 1: effects of α-viniferin on peripheral blood mononuclear cells (PBMC) proliferation. Supplemental Figure 2: evaluation of α-viniferin on the protein expression level of BCR-ABL. Supplemental Figure 3: evaluation of α-viniferin on the mRNA level of caspase-9. [file 1986962.f1.zip]

Archive with 8 entries (8 files):
- Supplementary Materials/Supplemental Figure 1.pdf
- Supplementary Materials/Supplemental Figure 2.pdf
- Supplementary Materials/Supplemental Figure 3.pdf
- Supplementary Materials/Supplemental Table-1.pdf
- Supplementary Materials/Supplemental Table-2.pdf
- Supplementary Materials/Supplemental Table-3.pdf
- Supplementary Materials/Supplemental Table-4.pdf
- Supplementary Materials/Supplemental Table-5.pdf
